# Supplementary material for: Strain-induced semimetal-to-semiconductor transition and indirect-to-direct band gap transition in monolayer 1T-TiS2
Source: Royal Society of Chemistry journal article supplement (doi:10.1039/c5ra16877e), 2015-01-01
Supplement: c5ra16877e1.pdf [file c5ra16877e1.pdf]

## Supporting Information

# Strain-induced semimetal-to-semiconductor transition and indirect-to-direct band gap transition in monolayer 1T-TiS<sub>2</sub>

Chengyong Xu, Paul A. Brown, and Kevin L. Shuford\*

*Department of Chemistry and Biochemistry, Baylor University, One Bear Place #97348,  
Waco, TX 76798-7348*

E-mail: kevin\_shuford@baylor.edu

# Monolayer TiS<sub>2</sub>

**Table 1:** The effect of strain on the geometry and band gap of monolayer 1T-TiS<sub>2</sub>. Negative (Positive) strain means compression (tensile).  $d_{\text{Ti-S}}$  is the bond length between nearest Ti and S atoms,  $h_{\text{S-S}}$  represents the interlayer height between upper and lower S atomic planes, and CT means charge transfer from Ti to S atoms. Negative band gap indicates overlapping of valence and conduction bands. VB-CB denotes the transition point from valence to conduction bands, and Ind/Dir refers to whether the transition of VB-CB is indirect or direct.

| strain (%) | $d_{\text{Ti-S}}$ (Å) | $h_{\text{S-S}}$ (Å) | CT ( $e$ ) | band gap (eV) | VB-CB | Ind/Dir |
|------------|-----------------------|----------------------|------------|---------------|-------|---------|
| -10        | 2.368                 | 3.150                | 1.528      | —             | —     | —       |
| -9         | 2.373                 | 3.120                | 1.546      | —             | —     | —       |
| -8         | 2.378                 | 3.091                | 1.566      | —             | —     | —       |
| -7         | 2.382                 | 3.058                | 1.608      | -1.004        | Γ-M   | Ind     |
| -6         | 2.387                 | 3.024                | 1.613      | -0.833        | Γ-M   | Ind     |
| -5         | 2.394                 | 2.999                | 1.626      | -0.670        | Γ-M   | Ind     |
| -4         | 2.400                 | 2.968                | 1.639      | -0.521        | Γ-M   | Ind     |
| -3         | 2.407                 | 2.939                | 1.656      | -0.379        | Γ-M   | Ind     |
| -2         | 2.413                 | 2.909                | 1.673      | -0.246        | Γ-M   | Ind     |
| -1         | 2.420                 | 2.879                | 1.685      | -0.121        | Γ-M   | Ind     |
| 0          | 2.427                 | 2.851                | 1.702      | -0.005        | Γ-M   | Ind     |
| +1         | 2.435                 | 2.822                | 1.721      | 0.106         | Γ-M   | Ind     |
| +2         | 2.443                 | 2.794                | 1.732      | 0.211         | Γ-M   | Ind     |
| +3         | 2.451                 | 2.766                | 1.742      | 0.309         | Γ-M   | Ind     |
| +4         | 2.459                 | 2.737                | 1.741      | 0.401         | Γ-M   | Ind     |
| +5         | 2.467                 | 2.708                | 1.746      | 0.487         | Γ-M   | Ind     |
| +6         | 2.476                 | 2.677                | 1.752      | 0.567         | Γ-Γ   | Dir     |
| +7         | 2.484                 | 2.646                | 1.759      | 0.594         | Γ-Γ   | Dir     |
| +8         | 2.492                 | 2.614                | 1.762      | 0.618         | Γ-Γ   | Dir     |
| +9         | 2.500                 | 2.581                | 1.769      | 0.641         | Γ-Γ   | Dir     |
| +10        | 2.508                 | 2.547                | 1.771      | 0.601         | I-Γ   | Ind     |
| +11        | 2.516                 | 2.511                | 1.779      | 0.550         | I-Γ   | Ind     |
| +12        | 2.524                 | 2.474                | 1.777      | 0.507         | I-Γ   | Ind     |
| +13        | 2.532                 | 2.436                | 1.777      | 0.470         | I-Γ   | Ind     |
| +14        | 2.540                 | 2.396                | 1.779      | 0.440         | I-Γ   | Ind     |
| +15        | 2.548                 | 2.354                | 1.778      | 0.431         | I-Γ   | Ind     |
| +16        | 2.555                 | 2.311                | 1.775      | 0.400         | I-Γ   | Ind     |
| +17        | 2.563                 | 2.267                | 1.778      | 0.389         | I-Γ   | Ind     |
| +18        | 2.571                 | 2.222                | 1.773      | 0.383         | I-Γ   | Ind     |
| +19        | 2.578                 | 2.174                | 1.771      | 0.384         | I-Γ   | Ind     |
| +20        | 2.586                 | 2.125                | 1.768      | 0.389         | I-Γ   | Ind     |

# Bulk TiS<sub>2</sub>

Bulk TiS<sub>2</sub> crystallizes in the 1T-CdI<sub>2</sub> structure with a  $P\bar{3}m1$  space group symmetry. The geometric and electronic properties of bulk TiS<sub>2</sub> have been calculated using VASP<sup>1</sup> with projector augmented wave pseudopotentials.<sup>2</sup> The zero-damping DFT-D3 method of Grimme<sup>3</sup> was adopted to describe the van der Waals interaction between adjacent TiS<sub>2</sub> layers. The optimization and energy calculation of bulk TiS<sub>2</sub> were performed on a dense  $k$ -point mesh of  $25 \times 25 \times 15$  and  $35 \times 35 \times 15$ , respectively. We obtained lattice constants for bulk TiS<sub>2</sub> of  $a = 3.4 \text{ \AA}$  and  $c = 5.7 \text{ \AA}$ , in good agreement with other reports.<sup>4-6</sup> The band structure and density of states for bulk 1T-TiS<sub>2</sub> are shown in 1. The Fermi level ( $E_F$ ) crosses the valence band and conduction band simultaneously, indicating a semimetallic nature.

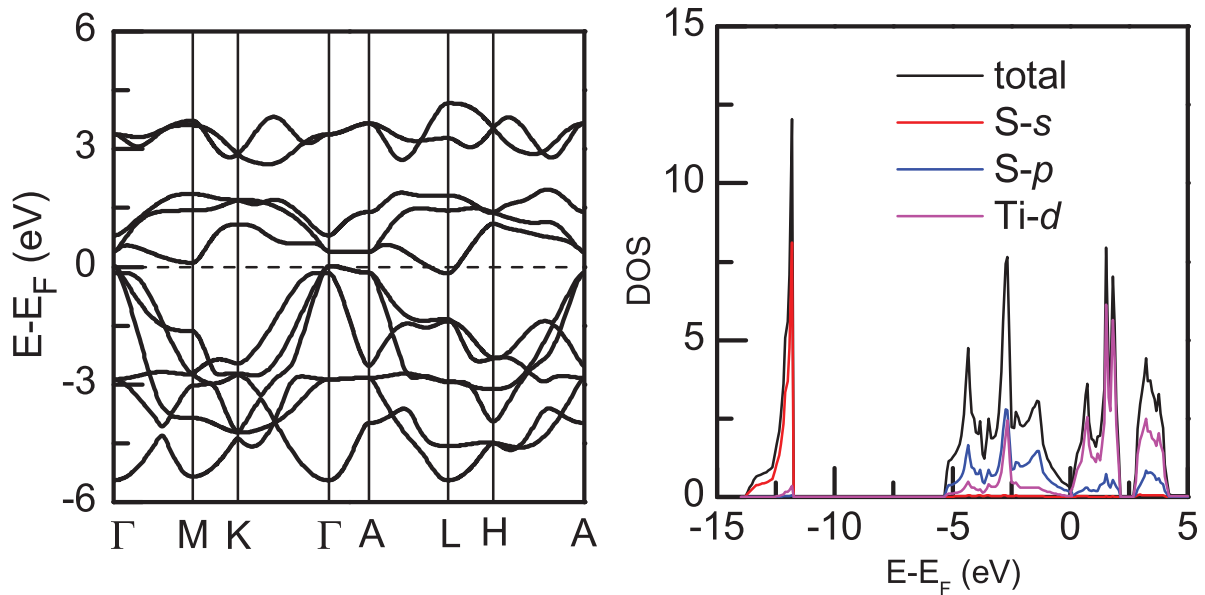

Figure 1: Band structure and density of states of bulk 1T-TiS<sub>2</sub>.

## References

- (1) Kresse, G.; Furthmüller, J. Efficient Iterative Schemes for Ab Initio Total-Energy Calculations using a Plane-Wave Basis Set. *Phys. Rev. B* **1996**, *54*, 11169–11186.
- (2) Blöchl, P. E. Projector Augmented-Wave Method. *Phys. Rev. B* **1994**, *50*, 17953–17979.
- (3) Grimme, S.; Antony, J.; Ehrlich, S.; Krieg, H. A Consistent and Accurate Ab Initio Parametrization of Density Functional Dispersion correction (DFT-D) for the 94 Elements H-Pu. *J. Chem. Phys.* **2010**, *132*, 154104.
- (4) Umrigar, C.; Ellis, D. E.; Wang, D.-S.; Krakauer, H.; Posternak, M. Band Structure, Intercalation, and Interlayer Interactions of Transition-Metal Dichalcogenides:  $\text{TiS}_2$  and  $\text{LiTiS}_2$ . *Phys. Rev. B* **1982**, *26*, 4935–4950.
- (5) Reshak, A. H.; Auluck, S. Electronic and Optical Properties of the  $1T$  Phases of  $\text{TiS}_2$ ,  $\text{TiSe}_2$ , and  $\text{TiTe}_2$ . *Phys. Rev. B* **2003**, *68*, 245113.
- (6) Samanta, A.; Pandey, T.; Singh, A. K. Strain-Induced Electronic Phase Transition and Strong Enhancement of Thermopower of  $\text{TiS}_2$ . *Phys. Rev. B* **2014**, *90*, 174301.
